# Supplementary material
Source: publisher figshare collection journal article supplement (https://frontiersin.figshare.com/ndownloader/files/12298640)
Supplement: Supplementary file [file 12298640]

## **SUPPLEMENTARY MATERIALS**

### **Cortical Gray Matter Loss, Augmented Vulnerability to Speech-on-Speech Masking, and Delusion in People with Schizophrenia**

**(Running Title:** Delusion and Informational Masking of Speech)

Chao Wu<sup>a</sup>, Yingjun Zheng<sup>b</sup>, Juanhua Li<sup>b</sup>, Shenglin She<sup>b</sup>, Hongjun Peng<sup>b</sup>, Liang Li<sup>c,d</sup>

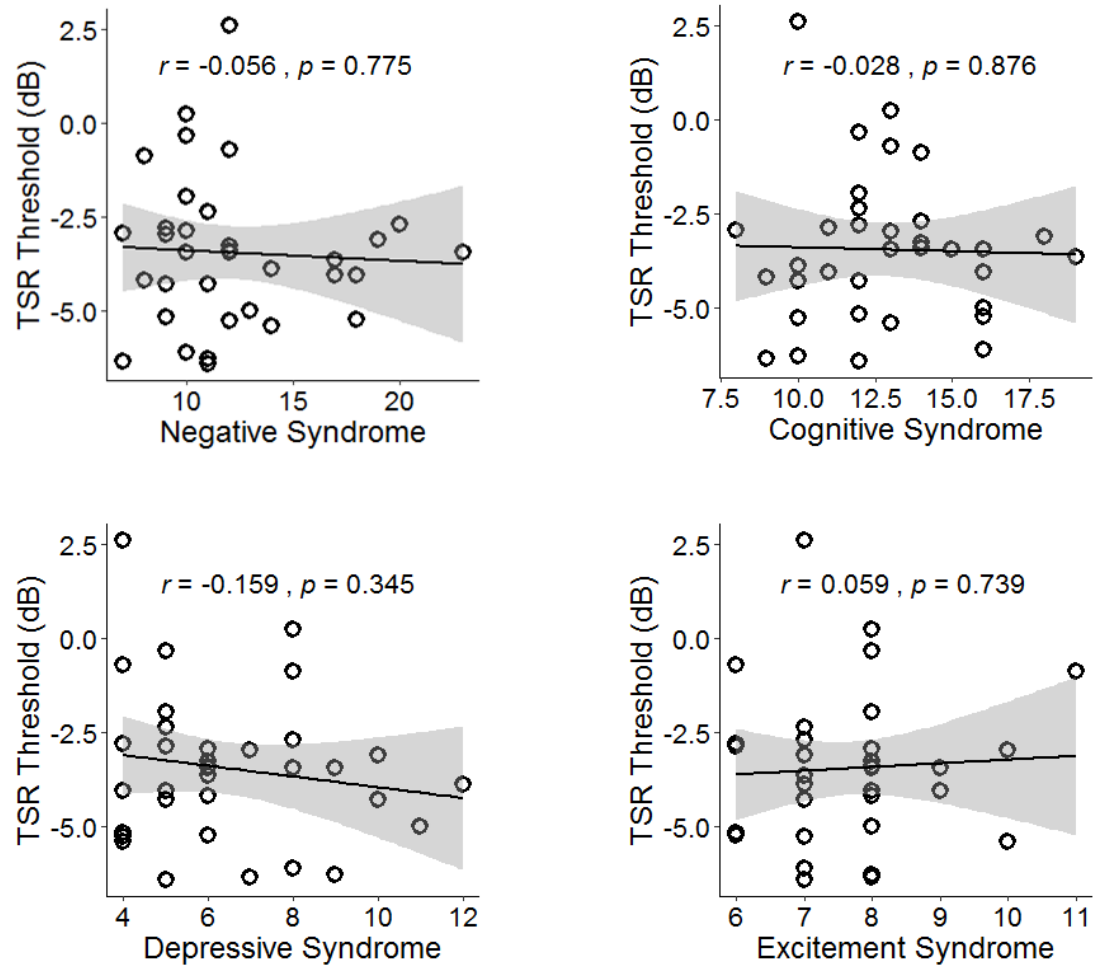

Figure S1. There were no significant correlations between the TSR threshold and the negative syndrome, the cognitive syndrome, the depressive/emotion syndrome, and the excitement syndrome of the CMV-PANSS.

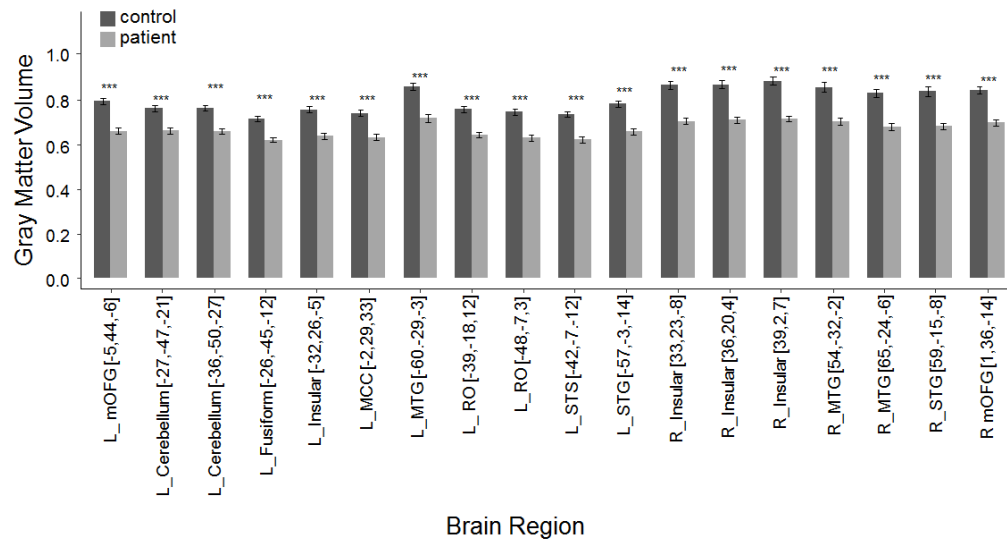

**Figure S2.** Bar plot for group comparison in gray matter volume. MCC, mid-cingulate cortex; mOFG, medial orbital frontal gyrus; RO, rolandic operculum; STG, superior temporal gyrus; STS, superior temporal sulcus; MTG, middle temporal gyrus.
